# Supplementary material for: Automated fragment formula annotation for electron ionisation, high resolution mass spectrometry: application to atmospheric measurements of halocarbons
Source: Springer Nature journal article supplement (doi:10.1186/s13321-021-00544-w), 2021-10-04
Supplement: 13321_2021_544_MOESM1_ESM.pdf [file 13321_2021_544_MOESM1_ESM.pdf]

## SUPPLEMENT

# Supplement for: Automated fragment formula annotation for electron ionisation, high resolution mass spectrometry: application to atmospheric measurements of halocarbons

Myriam Guillevic<sup>1\*</sup>, Aurore Guillevic<sup>2</sup>, Martin K. Vollmer<sup>1</sup>, Paul Schlauri<sup>1</sup>, Matthias Hill<sup>1</sup>, Lukas Emmenegger<sup>1</sup> and Stefan Reimann<sup>1</sup>

---

\*Correspondence:

[myriam.guillevic@empa.ch](mailto:myriam.guillevic@empa.ch)

<sup>1</sup>Laboratory for Air Pollution  
/Environmental Technology,  
Empa, Swiss Federal Laboratories  
for Materials Science and  
Technology, Ueberlandstrasse 129,  
8600 Dübendorf, Switzerland  
Full list of author information is  
available at the end of the article

## 1 Training set and validation set: SMILES codes

We provide here the SMILES codes for each of the substances in the training and validation set and if a mass spectrum is documented in the NIST spectral database [1].

**Table 1** Known compounds used as training set: CAS numbers, SMILES codes and presence in the NIST chemistry webbook [1]. All values are taken from the ChemSpider website [2], the PubChem website [3] and the NIST website [1].

| Compound                        | Chemical formula                                | CAS number | SMILES code                                    | NIST spectrum |
|---------------------------------|-------------------------------------------------|------------|------------------------------------------------|---------------|
| C <sub>2</sub> H <sub>6</sub>   | C <sub>2</sub> H <sub>6</sub>                   | 74-84-0    | CC                                             | yes           |
| C <sub>3</sub> H <sub>8</sub>   | C <sub>3</sub> H <sub>8</sub>                   | 74-98-6    | CCC                                            | yes           |
| CH <sub>3</sub> Cl              | CH <sub>3</sub> Cl                              | 74-87-3    | CCl                                            | yes           |
| COS                             | COS                                             | 463-58-1   | C(=O)=S                                        | yes           |
| NF <sub>3</sub>                 | NF <sub>3</sub>                                 | 7783-54-2  | N(F)(F)F                                       | yes           |
| Benzene                         | C <sub>6</sub> H <sub>6</sub>                   | 71-43-2    | C1=CC=CC=C1                                    | yes           |
| CH <sub>2</sub> Cl <sub>2</sub> | CH <sub>2</sub> Cl <sub>2</sub>                 | 75-09-2    | C(Cl)Cl                                        | yes           |
| HCFC-22                         | HCF <sub>2</sub> Cl                             | 75-45-6    | C(F)(F)Cl                                      | yes           |
| CF <sub>4</sub>                 | CF <sub>4</sub>                                 | 75-73-0    | C(F)(F)(F)F                                    | yes           |
| Toluene                         | C <sub>7</sub> H <sub>8</sub>                   | 108-88-3   | CC1=CC=CC=C1                                   | yes           |
| CH <sub>3</sub> Br              | CH <sub>3</sub> Br                              | 74-83-9    | CBr                                            | yes           |
| HCFC-142b                       | H <sub>3</sub> C <sub>2</sub> F <sub>2</sub> Cl | 75-68-3    | CC(F)(F)Cl                                     | yes           |
| SO <sub>2</sub> F <sub>2</sub>  | SO <sub>2</sub> F <sub>2</sub>                  | 2699-79-8  | O=S(=O)(F)F                                    | yes           |
| CFC-13                          | CF <sub>3</sub> Cl                              | 75-72-9    | C(F)(F)(F)Cl                                   | yes           |
| HCFC-141b                       | H <sub>3</sub> C <sub>2</sub> FCl <sub>2</sub>  | 1717-00-6  | CC(F)(Cl)Cl                                    | yes           |
| CHCl <sub>3</sub>               | CHCl <sub>3</sub>                               | 67-66-3    | C(Cl)(Cl)Cl                                    | yes           |
| CFC-12                          | CF <sub>2</sub> Cl <sub>2</sub>                 | 75-71-8    | C(F)(F)(Cl)Cl                                  | yes           |
| C <sub>2</sub> HCl <sub>3</sub> | C <sub>2</sub> HCl <sub>3</sub>                 | 79-01-6    | C(=C(Cl)Cl)Cl                                  | yes           |
| CFC-11                          | CFCl <sub>3</sub>                               | 75-69-4    | C(F)(Cl)(Cl)Cl                                 | yes           |
| HCFC-124                        | HC <sub>2</sub> F <sub>4</sub> Cl               | 2837-89-0  | C(C(F)(F)F)(F)Cl                               | yes           |
| PFC-116                         | C <sub>2</sub> F <sub>6</sub>                   | 76-16-4    | C(C(F)(F)F)(F)(F)F                             | yes           |
| CH <sub>3</sub> I               | CH <sub>3</sub> I                               | 74-88-4    | CI                                             | yes           |
| SF <sub>6</sub>                 | SF <sub>6</sub>                                 | 2551-62-4  | FS(F)(F)(F)F                                   | no            |
| Halon-1301                      | CF <sub>3</sub> Br                              | 75-63-8    | C(F)(F)(F)Br                                   | no            |
| CCl <sub>4</sub>                | CCl <sub>4</sub>                                | 56-23-5    | C(Cl)(Cl)(Cl)Cl                                | yes           |
| CFC-115                         | C <sub>2</sub> F <sub>5</sub> Cl                | 76-15-3    | C(C(F)(F)Cl)(F)(F)F                            | yes           |
| C <sub>2</sub> Cl <sub>4</sub>  | C <sub>2</sub> Cl <sub>4</sub>                  | 127-18-4   | C(=C(Cl)Cl)(Cl)Cl                              | yes           |
| Halon-1211                      | CF <sub>2</sub> ClBr                            | 353-59-3   | C(F)(F)(Cl)Br                                  | yes           |
| CFC-114                         | C <sub>2</sub> F <sub>4</sub> Cl <sub>2</sub>   | 76-14-2    | C(C(F)(F)Cl)(F)(F)Cl                           | yes           |
| CH <sub>2</sub> Br <sub>2</sub> | CH <sub>2</sub> Br <sub>2</sub>                 | 74-95-3    | C(Br)Br                                        | yes           |
| CFC-113                         | C <sub>2</sub> F <sub>3</sub> Cl <sub>3</sub>   | 76-13-1    | C(C(F)(Cl)Cl)(F)(F)Cl                          | yes           |
| PFC-218                         | C <sub>3</sub> F <sub>8</sub>                   | 76-19-7    | C(C(F)(F)F)(C(F)(F)F)(F)F                      | yes           |
| SF <sub>5</sub> CF <sub>3</sub> | SF <sub>5</sub> CF <sub>3</sub>                 | 373-80-8   | C(F)(F)(F)S(F)(F)(F)F                          | yes           |
| PFC-c318                        | C <sub>4</sub> F <sub>8</sub>                   | 115-25-3   | C1(C(C(C1(F)F)(F)F)(F)F)(F)F                   | yes           |
| Halon-2402                      | C <sub>2</sub> F <sub>4</sub> Br <sub>2</sub>   | 124-73-2   | C(C(F)(F)Br)(F)(F)Br                           | yes           |
| C <sub>6</sub> F <sub>14</sub>  | C <sub>6</sub> F <sub>14</sub>                  | 355-42-0   | C(C(C(C(F)(F)F)(F)F)(F)F)(C(C(F)(F)F)(F)F)(F)F | yes           |

**Table 2** Known compounds used as validation set: CAS numbers, SMILES codes and presence in the NIST chemistry webbook [1]. All values are taken from the ChemSpider website [2], the PubChem website [3] and the NIST website [1].

| Compound                                      | Chemical formula                                | CAS number  | SMILES code                          | NIST spectrum |
|-----------------------------------------------|-------------------------------------------------|-------------|--------------------------------------|---------------|
| Kigali Amendment to the Montreal Protocol     |                                                 |             |                                      |               |
| HFC-41                                        | H <sub>3</sub> CF                               | 593-53-3    | CF                                   | yes           |
| HFC-32                                        | H <sub>2</sub> CF <sub>2</sub>                  | 75-10-5     | C(F)F                                | yes           |
| HFC-152                                       | H <sub>4</sub> C <sub>2</sub> F <sub>2</sub>    | 624-72-6    | C(CF)F                               | yes           |
| HFC-152a                                      | H <sub>4</sub> C <sub>2</sub> F <sub>2</sub>    | 75-37-6     | CC(F)F                               | yes           |
| HFC-23                                        | HCF <sub>3</sub>                                | 75-46-7     | C(F)(F)F                             | yes           |
| HFC-143                                       | H <sub>3</sub> C <sub>2</sub> F <sub>3</sub>    | 430-66-0    | C(C(F)F)F                            | yes           |
| HFC-143a                                      | H <sub>3</sub> C <sub>2</sub> F <sub>3</sub>    | 420-46-2    | CC(F)(F)F                            | yes           |
| HFC-134                                       | H <sub>2</sub> C <sub>2</sub> F <sub>4</sub>    | 359-35-3    | C(C(F)F)(F)F                         | yes           |
| HFC-134a                                      | H <sub>2</sub> C <sub>2</sub> F <sub>4</sub>    | 811-97-2    | C(C(F)(F)F)F                         | yes           |
| HFC-125                                       | HC <sub>2</sub> F <sub>5</sub>                  | 354-33-6    | C(C(F)(F)F)(F)F                      | yes           |
| HFC-245ca                                     | H <sub>3</sub> C <sub>3</sub> F <sub>5</sub>    | 679-86-7    | C(C(C(F)F)(F)F)F                     | yes           |
| HFC-245fa                                     | H <sub>3</sub> C <sub>3</sub> F <sub>5</sub>    | 460-73-1    | C(C(F)F)C(F)(F)F                     | no            |
| HFC-365mfc                                    | H <sub>5</sub> C <sub>4</sub> F <sub>5</sub>    | 406-58-6    | CC(CC(F)(F)F)(F)F                    | no            |
| HFC-236cb                                     | H <sub>2</sub> C <sub>3</sub> F <sub>6</sub>    | 677-56-5    | C(C(C(F)(F)F)(F)F)F                  | no            |
| HFC-236ea                                     | H <sub>2</sub> C <sub>3</sub> F <sub>6</sub>    | 431-63-0    | C(C(F)F)(C(F)(F)F)F                  | yes           |
| HFC-236fa                                     | H <sub>2</sub> C <sub>3</sub> F <sub>6</sub>    | 690-39-1    | C(C(F)(F)F)C(F)(F)F                  | yes           |
| HFC-227ea                                     | HC <sub>3</sub> F <sub>7</sub>                  | 431-89-0    | C(C(F)(F)F)(C(F)(F)F)F               | no            |
| HFC-43-10mee                                  | H <sub>2</sub> C <sub>5</sub> F <sub>10</sub>   | 138495-42-8 | C(C(C(F)(F)F)F)(C(C(F)(F)F)(F)F)F    | no            |
| HFOs                                          |                                                 |             |                                      |               |
| HFO-1234yf                                    | H <sub>2</sub> C <sub>3</sub> F <sub>4</sub>    | 754-12-1    | C=C(C(F)(F)F)F                       | no            |
| HFO-1234ze(E)                                 | H <sub>2</sub> C <sub>3</sub> F <sub>4</sub>    | 29118-24-9  | C(=CF)C(F)(F)F                       | no            |
| HCFO-1233zd(E)                                | H <sub>2</sub> C <sub>3</sub> F <sub>3</sub> Cl | 102687-65-0 | C(=CCl)C(F)(F)F                      | no            |
| Halogenated compounds with high boiling point |                                                 |             |                                      |               |
| HCBD                                          | C <sub>4</sub> Cl <sub>6</sub>                  | 87-68-3     | C(=C(Cl)Cl)(C(=C(Cl)Cl)Cl)Cl         | yes           |
| TCHFB                                         | C <sub>4</sub> Cl <sub>4</sub> F <sub>6</sub>   | 375-45-1    | C(C(C(F)(F)Cl)(F)Cl)(C(F)(F)Cl)(F)Cl | no            |

## 5 2 Mass calibration procedure

A time-of-flight (ToF) instrument measures a time, elapsed between two events: the extraction and the detection, when the ions hit the detector plate. To convert this time measurement into a mass measurement in the most possible accurate manner, internal mass calibration proves to be a good strategy. Known masses detected during a measurement are used to establish the calibration function between ToF and mass. In our cases, we use known masses produced by fragmentation of a mass calibration substance, perfluoroperhydrophenanthrene (PFPHP), of chemical formula  $C_{14}F_{24}$ . Only two types of atoms are present in this molecule, carbon (mass 12.000000) and fluorine (mass 18.99840316). The most abundant peaks can therefore be associated to a unique molecular formula. For example, the peak at integer mass 69 can be associated to  $CF_3^+$  only, of exact mass 68.99466108.

Based on the NIST mass spectrum and our measured mass spectrum for PFPHP, we have chosen a list of 13 masses present with a sufficient abundance to be used for mass calibration. In addition, we use the masses of  $N_2$ ,  $O_2$ , Ar, which are the most abundant air components and may slightly leak in our system, as well as Cl, also observed to be always present in our detector. The masses are chosen to be evenly distributed between the minimum and maximum masses, covering a range from  $m/z = 28.0055994348$  ( $N_2^+$ ) to  $m/z = 292.98188618$  ( $C_7F_{11}^+$ ).

We have observed that our ToF detector is subject to mass drift of up to 100 ppm during a run. This drift is possibly due to temperature variation of our preceding GC. To correct for this drift, we perform a mass calibration every two minutes, using average data of the preceding and following two minutes. For each set of four-minutes-averaged data, all peaks in the mass domain near the exact masses of the selected list are detected. Note that several mass peaks can be detected where only one exact mass from the calibrant is expected. Each detected peak is fitted using a pseudo-Voigt function, which is a combination of a Gaussian and a Lorentzian function:

$$f(x; A, \mu, \sigma, \alpha, b) = (1-\alpha) \frac{A}{\sigma\sqrt{2\pi}} \exp\left(-\frac{(x-\mu)^2}{2\sigma^2}\right) + \alpha \frac{A}{\pi} \left(\frac{\sigma_L}{(x-\mu)^2 + \sigma_L^2}\right) + b \quad (1)$$

where

$$\sigma_L = \sigma\sqrt{2\ln(2)} \quad (2)$$

and the full-width-at-half-maximum (FWHM)

$$\text{FWHM} = 2\sigma\sqrt{2\ln(2)} = 2\sigma_L \quad (3)$$

The parameter FWHM is used later on ([Main article, Section 2.5.1](#)) to generate candidate mass peaks with the appropriate peak broadness.

Then, all obtained centres of ToF are associated to the closed expected exact mass. The entire set of pairs (ToF; expected exact mass) is used to fit a calibration function of the form:

$$i_{\text{ToF}} = p_1 m^{p_3} + p_2 \quad (4)$$

with  $i_{\text{ToF}}$  the time of flight index and  $m$  the exact mass. The parameters  $p_1$ ,  $p_2$  and  $p_3$  are optimised using the Python lmfit package. According to theory,  $p_3$  should be equal to 0.5 [1]. However a better accuracy is obtained when  $p_3$  is allowed to slightly vary. If one or several pairs are further away from the fit than a set maximum value (20 ppm in our case), the furthest away pair is eliminated and the optimisation routine is repeated. This one-by-one pair elimination improves the robustness of the algorithm. This was proven necessary as when measuring real air from the industrial area where Empa is located, once in while a prominent pollution event occurs, producing outstanding mass peaks that may be in the vicinity of the expected peak, even masking it, therefore disturbing the mass calibration function.

Once all residuals are below the set value, the mass calibration is complete. Any ToF value can then be converted to a  $m/z$  value using:

$$m = \left( \frac{i_{\text{ToF}} - p_2}{p_1} \right)^{\frac{1}{p_3}} \quad (5)$$

where  $p_1$ ,  $p_2$  and  $p_3$  are calculated at any given specific time as linear interpolation using their time-bracketing optimised values.

### 3 Uncertainty of the mass calibration

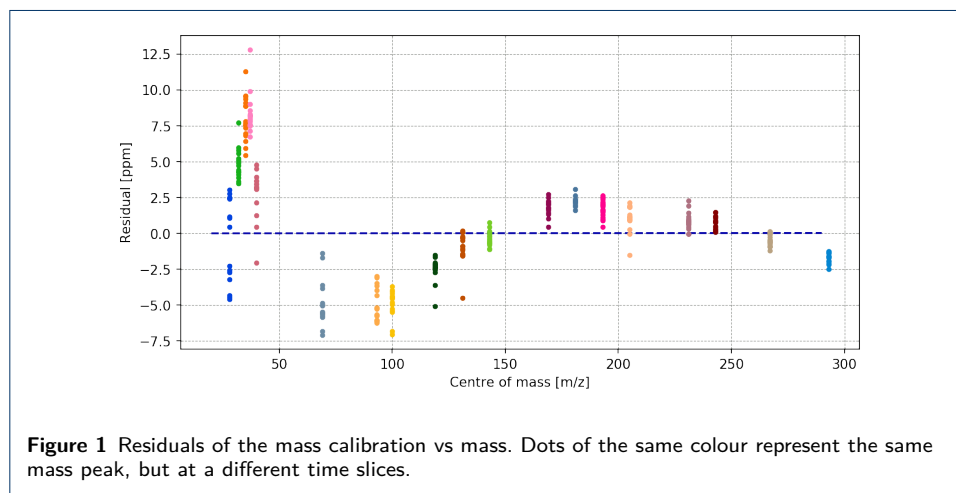

After the optimisation, the obtained fit parameters are used to calculate the reconstructed  $m/z$  values; these values are then compared to the expected exact  $m/z$ , for each time slice of four minutes. The obtained offsets, expressed in ppm over the mass domain, are displayed in Fig. 1. With our instrument, the observed mass accuracy is better for larger masses, with residuals usually below 5 ppm for masses higher than 100  $m/z$ , while the accuracy can deteriorate to 20 ppm below 50  $m/z$ . This is potentially due to the mass resolution of our instrument that is around 3000 for masses smaller than 50  $m/z$  but around 4000 for larger masses.

To reflect this varying mass accuracy over the mass domain, for each used exact mass, we use as uncertainty the maximum observed offset at this mass. Then for any measured mass, its uncertainty is calculated as a linear interpolation between uncertainty at bracketing masses. This constitutes the mass calibration uncertainty.

[1] [https://en.wikipedia.org/wiki/Time-of-flight\\_mass\\_spectrometry](https://en.wikipedia.org/wiki/Time-of-flight_mass_spectrometry)

## 4 Validation set: preparation of qualitative standards for compounds newly regulated by the Kigali amendment to the Montreal Protocol

Eighteen substances listed under the Kigali Amendment to the Montreal Protocol were part of the validation set.

First, substances were separated in two groups, with the aim that each group should not contain isomers, to make sure each substance could be identified by its mass spectrum only. Group A contained: HFC-41, HFC-143a, HFC-134a, HFC-227ea, HFC-236ea, HFC-245fa, HFC-43-10-mee, HFC-152 and HFC-236cb. Group B contained: HFC-32, HFC-23, HFC-125, HFC-152a, HFC-365mfc, HFC-143, HFC-236fa, HFC-245ca and HFC-134.

The pure substances were bought from Synquest Laboratories (Florida, USA). For each group, the pure substances were spiked one after the other into synthetic air, and the mixture was pressurised into a flask. The two obtained mixtures were prepared at approximately  $6.5 \text{ nmol}\cdot\text{mol}^{-1}$ .

Then, each mixture was measured by our preconcentration, gas chromatography, time-of-flight mass spectrometry instrumentation. Data analysis then followed the same procedure as explained in the main article.

## 5 Algorithmic improvements

We describe our algorithmic improvements to speed-up the running-time of some critical steps.

### 5.1 Organisation of the chemical formulae in a directed acyclic graph (DAG)

After running the knapsack algorithm, many candidate chemical formulae are obtained, hereafter simply referred to as 'formulae'. We organise them in a graph. In this graph, a node  $n_j$  is a descendant of a node  $n_i$  if the node's fragment  $s_j$  is a sub-fragment of the fragment  $s_i$  of the node  $n_i$ . For example, CCl is a descendant of CCl<sub>3</sub>. Conversely, a node  $n_i$  is an ancestor of a node  $n_j$  if its fragment  $s_i$  is a sup-fragment of the fragment  $s_j$ . This defines a *partial order* on the formulae that we formally define in Definition 1.

**Definition 1** (Partial order) We define the following partial order on the formulae. Let  $s_i$  and  $s_j$  be two formulae encoded as vectors of non-negative integers.

- The formula  $s_j$  is *smaller than* the formula  $s_i$ , denoted  $s_j \leq s_i$ , if  $s_j$  is a sub-fragment of  $s_i$ ;
- The formula  $s_j$  is *greater than* the formula  $s_i$ , denoted  $s_j \geq s_i$ , if  $s_j$  is a sup-fragment of  $s_i$ ;
- otherwise  $s_i$  and  $s_j$  are *incomparable*.

Organising a set  $\mathcal{S}$  of  $n$  items (here fragments) in a DAG (directed acyclic graph) can take as many as  $n^2$  comparisons of items, but since  $\mathcal{S}$  can be quite large (e.g.,  $n = 10000$ ), it makes sense to reduce the number of comparisons. Moreover, the graph should have as few edges as possible, that is, two formulae  $s_i \geq s_j$  are bonded with an edge if and only if there is no other formula  $s_{i'}$  that could be inserted between them like  $s_i \geq s_{i'} \geq s_j$ . For example with CCl, CCl<sub>2</sub> and CCl<sub>3</sub>, we will define the graph with minimal edges on the left, not the one of the right (Fig. 2).

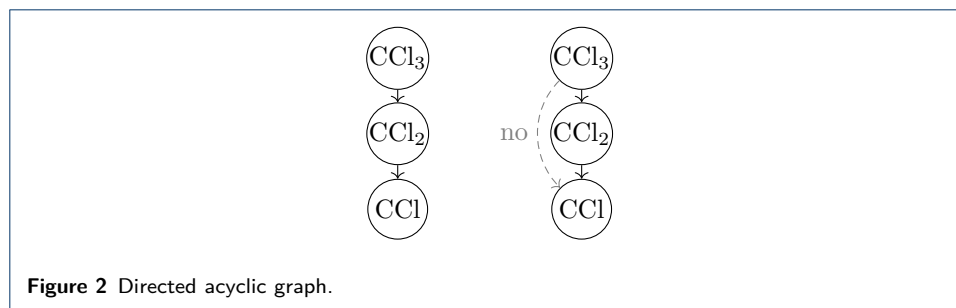

We now explain how we reduced the number of comparisons between fragments to  
 95 set the edges, thus improving the complexity of building the graph. First the target  
 masses are sorted in decreasing order before the knapsack step. Hence the output  
 of the knapsack is made of batches of chemical formulae, each one for a given target  
 mass, in decreasing order. *Because the mass uncertainty is far thinner than  $0.5m/z$ ,  
 all chemical formulae for one target mass are incomparable: it is not possible to find  
 100 that a formula is a sub-fragment of another, for the same target mass, otherwise the  
 mass difference between the two would be at least  $1m/z$ .*

Therefore we have a list of formulae  $\{s_i\}_{1 \leq i \leq \#S}$  such that for any formula  $s_i$ ,  
 the formulae in the preceding batches weight more and are either incomparable  
 or contain  $s_i$  as a sub-fragment, and the formulae in the forthcoming batches are  
 105 lighter and either incomparable or sub-fragments of  $s_i$ . The maximal fragments will  
 be the nodes at the “roots” of the DAG. They are made of the formulae of the first  
 (heaviest) batch, and some other formulae from other batches.

We maintain a list of the root nodes (maximal fragments) of the graph. They  
 have no ancestor, and they are incomparable to each other. To add a new formula  
 110 in the graph, because of the ordering of the formulae, we know that it is either  
 incomparable, or a subfragment of any node of the graph. *It cannot be a sup-  
 fragment (a parent) of any node of the graph.* We compare the new formula to each  
 of the maximal fragments. If it is incomparable to any of them, we add it as a new  
 maximal fragment. Otherwise, for each maximal fragment that has the new formula  
 115 as sub-fragment, we compare the new one to its children. If it is incomparable to any  
 of the children, we add it as a new child of the maximal fragment (we add an edge  
 toward it). Otherwise, we recursively explore the children of the children that have  
 this new formula as sub-fragment. In this way, we avoid many useless comparisons:  
 all children of incomparable nodes are omitted.

120 Thanks to the list of maximal fragments, the singletons are identified right away:  
 they are the maximal fragments without any child. Figure 2n the main article shows  
 the graph obtained for  $\text{CCl}_4$ .

## 5.2 Removing a node and updating the edges

A node  $n$  to be removed has parents (closest sup-fragments) connected with one  
 125 edge, and children (closest sub-fragments) connected with one edge. We wrote this  
 procedure to remove a node and update the edges and list of maximal fragments  
 (Alg. 1, example in Fig. 3).

---

**Algorithm 1:** remove the node  $n$  and update the edges

```

for each parent  $p_i$  of  $n$  do
  remove the edge from  $p_i$  to  $n$  ;
  for each child  $c_i$  of  $n$  do
    lists its own parents  $q_j$  (without  $n$ ) ;
    if none of  $q_j$  is a sub-fragment of  $p_i$  then
      add an edge from  $p_i$  to  $c_i$  (if there is one  $q_j$  which is a sub-fragment of  $p_i$ , do
        nothing: the edges are already fine)
for each child  $c_i$  of  $n$  do
  remove the edge from  $n$  to  $c_i$  ;
  if  $c_i$  has no more parent after removing  $n$  then
    add it in the list of maximal fragments
if  $n$  is a maximal fragment (it has no parent) then
  remove it from the list of maximal fragments
Remove  $n$ 

```

---

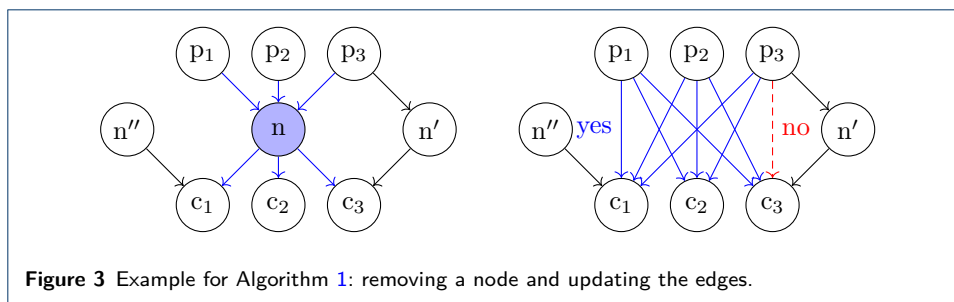

**Figure 3** Example for Algorithm 1: removing a node and updating the edges.

### 5.3 Enumeration of isotopocules

We now recall the computation of the relative intensities of the minor isotopocules (see [4] for a detailed computation). The abundant formula has proportion (of the set of all isotopocules)  $pr = \prod_{\{\text{element } e\}} (a_{e,0})^{n_e}$ . The product is over all the distinct atoms (denoted  $e$ ),  $a_{e,0}$  is the abundance of the most abundant isotope of an atom, and  $n_e$  is the number of occurrences of that atom in the chemical formula. For example, with  $\text{CCl}_4$  one computes  $pr = a_C a_{\text{Cl}}^4 = 0.326$ . An isotopocule with only one element  $e$  and  $i$  minor isotopes of abundance  $a_{e,i}$  has proportion

$$\begin{aligned}
 pr_e &= a_{e,0}^{n_e,0} \binom{n_e}{n_{e,0}} a_{e,1}^{n_e,1} \binom{n_e - n_{e,0}}{n_{e,1}} a_{e,2}^{n_e,2} \binom{n_e - n_{e,0} - n_{e,1}}{n_{e,2}} \cdots a_{e,i}^{n_e,i} \binom{n_e - n_{e,0} - n_{e,1} - \cdots - n_{e,i-1}}{n_{e,i}} \\
 &= a_{e,0}^{n_e,0} a_{e,1}^{n_e,1} a_{e,2}^{n_e,2} \cdots a_{e,i}^{n_e,i} \frac{n_e!}{n_{e,0}! n_{e,1}! n_{e,2}! \cdots n_{e,i}!}
 \end{aligned}$$

where the terms  $\binom{n}{m} = \frac{n!}{m!(n-m)!}$  are binomial coefficients with  $n \geq m$ , denoting the number of ways to choose  $m$  items in a set of size  $n$ . Their product simplifies in  $n_e! / (n_{e,0}! n_{e,1}! n_{e,2}! \cdots n_{e,i}!)$ . An isotopocule has proportion

$$pr = \prod_e n_e! \prod_i (a_{e,i})^{n_{e,i}} / (n_{e,i}!) \quad (6)$$

where  $e$  ranges over the elements,  $i$  ranges over the isotopes of an element,  $n_e$  is the total number of an element (with all isotopes),  $n_{e,i}$  is the number of occurrences of one isotope. The relative intensity of a minor-isotope formula is the ratio (see [4])

$$p = \frac{\prod_e n_e! \prod_i (a_{e,i})^{n_{e,i}} / (n_{e,i}!)}{\prod_e (a_{e,0})^{n_e}} = \prod_e n_e! \prod_{i>0} \left( \frac{a_{e,i}}{a_{e,0}} \right)^{n_{e,i}} \frac{1}{n_{e,i}!} . \quad (7)$$



One needs to enumerate all the possible combinations of isotopes of a given element.  
130 This is a classical problem in combinatorics. Denote by  $i$  the number of isotopes  
(the abundant one included). Enumerate all the ways to sum at most  $i$  positive  
integers to obtain  $n_e$ . It can be seen as a knapsack-like problem: given all isotopes  
each of “weight” 1, finds how to sum to  $n_e$ . In particular, each isotope is allowed at  
most  $n_e$  times.

135 All ratios are relative to the abundant chemical formula, whose maximum possible  
intensity is known: this is the intensity of the corresponding measured mass. To  
improve the running-time of the enumeration, we do not list the minor isotopocules  
whose intensity would be below the detection threshold of the ToF-MS. For this  
purpose, we consider the elements one after the other. We maintain a list of partial  
140 isotopocules with their partial relative intensity, made of the elements processed  
so far. The list is ordered by decreasing relative intensity. Given a new element  $e$   
and its occurrence  $n_e$ , we generate its isotopic patterns, the abundant one included,  
and sort them in decreasing order of relative intensity. Reading the two lists in  
decreasing order of relative intensity, we combine the new isotopes to the partial  
145 solutions and multiply together the intensities. A loop over a list stops as soon as  
the product of intensities is below the partial threshold. Once the new list of partial  
solutions is computed, it is sorted in decreasing order of relative intensity. Then,  
the next element is processed in the same manner, until all elements are done. The  
first item of the resulting list is the isotopocule of highest relative intensity (it can  
150 be greater than one). For implementation purpose, we scale the list and divide all  
numbers by this highest relative intensity, so that everything is in the interval  $[0, 1]$ .

## 6 Full Numerical Example with carbon tetrachloride

For  $\text{CCl}_4$  found at a retention time of 1708.27 s, nineteen masses are observed, listed  
in Table 7 with uncertainty and intensity.

### 155 6.1 Knapsack algorithm with two lists but without considering separately multi-valent and mono-valent atoms

In this paragraph we present an example of a knapsack algorithm with two  
sets of atoms, and two lists of intermediate masses. The candidate atoms are  
H, C, N, O, F, S, Cl, Br, I. We arbitrarily define two subsets: {C, N, O, S,  
160 Br} and {H, F, Cl, I}. The knapsack algorithm is run with input the masses  
of the atoms of each set, and the minimal mass is set to 1. One obtains  
two lists: A and B given in Table 5. The lists are sorted in increasing order  
of mass. One obtains  $A = [(12.0, \text{C}), (14.0030740074, \text{N}), (15.9949146223,$   
 $\text{O}), (24.0, \text{C}_2), (26.003074007400002, \text{CN}), (27.9949146223, \text{CO}), (28.0061480148,$   
165  $\text{N}_2), (29.9979886297, \text{NO}), (31.97207073, \text{S}), (31.9898292446, \text{O}_2)]$  and  $B =$   
 $[(1.0078250319, \text{H}), (2.0156500638, \text{H}_2), \dots(\text{all } \text{H}_3 \dots_{17}), (18.140850574199998, \text{H}_{18}),$   
 $(18.99840316, \text{F}), (19.1486756061, \text{H}_{19}), (20.0062281919, \text{HF}), \dots(\text{all } \text{H}_{20} \dots_{33} \text{ and}$   
 $\text{H}_2 \dots_{14}\text{F}), (34.1157786385, \text{H}_{15}\text{F}), (34.2660510846, \text{H}_{34}), (34.96885271, \text{Cl})]$ . Then  
pairing the masses of the two lists, one obtains masses within the target interval  
170 (if any): there is one solution (34.96885271, Cl). Finally, the DBE is computed and  
solutions with a negative DBE are discarded. This first approach has a major draw-  
back: many impossible sub-fragments are enumerated, in particular because of the  
Hydrogen which has a very small mass, and is mono-valent.

Here is a detailed example to compute the lists A and B for the first target  
 175 mass  $m_{\max} = 34.97006625322406$ . First one computes multiples of each mass up  
 to  $m_{\max}$ . One obtains Tables 3 and 4. Then one combines at most one mass per  
 column, starting the enumeration with the lightest mass of each column (the first  
 row value). One obtains the fragments of the first row of Table 5.

**Table 3** Initial partial list of masses before computing the list A made of fragments of atoms {C, N, O, S, Br} and masses up to  $m_{\max} = 34.97006625322406$ .

| # | C  | N             | O             | S           | Br |
|---|----|---------------|---------------|-------------|----|
| 1 | 12 | 14.0030740074 | 15.9949146223 | 31.97207073 |    |
| 2 | 24 | 28.0061480148 | 31.9898292446 |             |    |

**Table 4** Initial partial list of masses before computing the list B made of fragments of atoms {H, F, Cl, I} and masses up to  $m_{\max} = 34.97006625322406$ . There are 34 multiples of Hydrogen: H, H<sub>2</sub>, up to H<sub>34</sub>.

|    | H             | F           | Cl          | I |
|----|---------------|-------------|-------------|---|
| 1  | 1.0078250319  | 18.99840316 | 34.96885271 |   |
| 2  | 2.0156500638  |             |             |   |
| ⋮  | ⋮             |             |             |   |
| 34 | 34.2660510846 |             |             |   |

**Table 5** Intermediate lists in the knapsack algorithm with two sets of atoms {C, N, O, S, Br} for the list A and {H, F, Cl, I} for the list B. The notation H<sub>1-34</sub> means all the 34 fragments made of one to 34 atoms of Hydrogen. The notation C<sub>1-2</sub>O means CO and C<sub>2</sub>O.

| target mass interval                     | #A | A                                                                                                                                                                                                       | #B  | B                                                                                                                            | all sol. | DBE ≥ 0 |
|------------------------------------------|----|---------------------------------------------------------------------------------------------------------------------------------------------------------------------------------------------------------|-----|------------------------------------------------------------------------------------------------------------------------------|----------|---------|
| 34.96751070677594,<br>34.97006625322406  | 10 | S, O <sub>1-2</sub> , NO, CO,<br>N <sub>1-2</sub> , CN, C <sub>1-2</sub>                                                                                                                                | 51  | Cl, H <sub>1-15</sub> F, F,<br>H <sub>1-34</sub>                                                                             | 1        | Cl      |
| 35.974137795964566,<br>35.97778836403543 | 10 | S, O <sub>1-2</sub> , NO, CO,<br>N <sub>1-2</sub> , CN, C <sub>1-2</sub>                                                                                                                                | 54  | HCl, Cl,<br>H <sub>1-16</sub> F, F,<br>H <sub>1-35</sub>                                                                     | 1        | HCl     |
| 36.96406557296814,<br>36.967505987031856 | 11 | S, O <sub>1-2</sub> , NO, CO,<br>N <sub>1-2</sub> , CN, C <sub>1-3</sub>                                                                                                                                | 56  | HCl, Cl,<br>H <sub>1-17</sub> F, F,<br>H <sub>1-36</sub>                                                                     | 0        | 0       |
| 46.96648952357635,<br>46.970287436423654 | 21 | NS, CS, S, NO <sub>2</sub> ,<br>CO <sub>2</sub> , O <sub>1-2</sub> , N <sub>2</sub> O, NO,<br>CNO, C <sub>1-2</sub> O, N <sub>1-3</sub> ,<br>CN <sub>2</sub> , C <sub>1-2</sub> N, C <sub>1-3</sub>     | 95  | H <sub>1-11</sub> Cl, Cl,<br>H <sub>1-8</sub> F <sub>2</sub> , F <sub>1-2</sub> ,<br>H <sub>1-27</sub> F, H <sub>1-46</sub>  | 1        | CCl     |
| 48.962558174089345,<br>48.96840118591066 | 24 | OS, NS, CS, S, O <sub>1-3</sub> ,<br>NO <sub>2</sub> , CO <sub>2</sub> , N <sub>2</sub> O, NO,<br>CNO, C <sub>1-2</sub> O, N <sub>1-3</sub> ,<br>CN <sub>2</sub> , C <sub>1-2</sub> N, C <sub>1-4</sub> | 103 | H <sub>1-13</sub> Cl, Cl,<br>H <sub>1-10</sub> F <sub>2</sub> , F <sub>1-2</sub> ,<br>H <sub>1-29</sub> F, H <sub>1-48</sub> | 0        | 0       |

## 6.2 Faster knapsack: avoiding enumerating fragments of negative DBE value

180 With two arbitrary lists, many impossible partial fragments are enumerated, in  
 particular with too many hydrogens. It would speed-up the process to know an  
 upper bound on the number of mono-valent atoms. To be able to compute such  
 value, the first list, denoted M, is now made of the multi-valent atoms and the second  
 list, denoted m, made of mono-valent atoms only. In this way, after computing the  
 185 list M, one can compute the DBE value of each partial fragment made of multi-  
 valent atoms only. An upper bound on the number of mono-valent atoms is two  
 times the maximum DBE value obtained over the list M. This upper bound allows  
 to constraint the enumeration of the list m, hence reducing the running-time and  
 the length of the second list. Table 6 presents a comparison of the lengths of the  
 190 lists A, B, M and m for the target masses of CCl<sub>4</sub>. We observed that the list m is  
 at least two times smaller than the list B.

**Table 6** Intermediate lists in the knapsack algorithm with two sets of atoms {C, N, O, S, Br} for the list A and {H, F, Cl, I} for the list B, then with a set of multi-valent atoms {C, N, O, S} giving the list M, and a set of mono-valent atoms {H, F, Cl, Br, I} giving the list m. After enumerating the list M, the maximum possible valence is computed and used as an upper bound on the number of mono-valent atoms to generate the list m. One observes that this technique allows to divide by more than two the length of the second list.

| target mass interval                   | #A  | #B  | # sol. | #M  | 2 max DBE | #m  | DBE $\geq 0$ |
|----------------------------------------|-----|-----|--------|-----|-----------|-----|--------------|
| 34.96751070677594, 34.97006625322406   | 10  | 51  | 1      | 10  | 6         | 13  | 1            |
| 35.974137795964566, 35.97778836403543  | 10  | 54  | 1      | 10  | 6         | 14  | 1            |
| 36.96406557296814, 36.967505987031856  | 11  | 56  | 0      | 11  | 8         | 18  | 0            |
| 46.96648952357635, 46.970287436423654  | 21  | 95  | 1      | 21  | 8         | 31  | 1            |
| 48.962558174089345, 48.96840118591066  | 24  | 103 | 0      | 24  | 10        | 39  | 0            |
| 59.960220186945, 59.971315773055004    | 37  | 156 | 1      | 37  | 10        | 48  | 1            |
| 81.9330864132061, 81.9395331467939     | 90  | 315 | 1      | 89  | 14        | 110 | 1            |
| 82.93831758560036, 82.95111397439963   | 94  | 324 | 3      | 93  | 14        | 115 | 2            |
| 83.93024931474109, 83.9372426452589    | 94  | 333 | 0      | 93  | 14        | 117 | 0            |
| 84.92634272134954, 84.97112963865045   | 101 | 342 | 7      | 100 | 16        | 135 | 4            |
| 85.92419323227152, 85.93924312772849   | 101 | 351 | 1      | 100 | 16        | 137 | 1            |
| 97.9236485334006, 97.9389656265994     | 154 | 477 | 3      | 150 | 18        | 189 | 2            |
| 99.90729357057015, 99.94127718942985   | 161 | 501 | 4      | 157 | 18        | 197 | 3            |
| 116.90200574284233, 116.90847941715768 | 274 | 735 | 2      | 262 | 20        | 293 | 1            |
| 117.89455759263474, 117.92205636736527 | 275 | 751 | 5      | 262 | 20        | 300 | 3            |
| 118.89897942315969, 118.9056775368403  | 287 | 766 | 0      | 274 | 20        | 305 | 0            |
| 119.89648859190275, 119.91785116809724 | 290 | 782 | 2      | 275 | 20        | 311 | 1            |
| 120.89523104367791, 120.90302931632209 | 306 | 798 | 1      | 291 | 22        | 345 | 0            |
| 122.8875535007597, 122.90537265924031  | 323 | 830 | 1      | 305 | 22        | 357 | 1            |

**Table 7** Measured masses at RT = 1708.27s. In blue, the correct guess made by knapsack. In orange, the identified isotopocules.

| measured mass (m/z) | mass range with uncertainty              | intensity  | knapsack                                                                                     | identified                                            |
|---------------------|------------------------------------------|------------|----------------------------------------------------------------------------------------------|-------------------------------------------------------|
| 34.96878848         | [ 34.96751070677594, 34.97006625322406]  | 2722.2042  | Cl                                                                                           | Cl                                                    |
| 35.97596308         | [ 35.974137795964566, 35.97778836403543] | 1051.6898  | HCl                                                                                          | HCl                                                   |
| 36.96578578         | [ 36.96406557296814, 36.967505987031856] | 914.6638   | –                                                                                            | [ <sup>37</sup> Cl]                                   |
| 46.96838848         | [ 46.96648952357635, 46.970287436423654] | 3784.4981  | CCl                                                                                          | CCl                                                   |
| 48.96547968         | [ 48.962558174089345, 48.96840118591066] | 1192.8077  | –                                                                                            | C[ <sup>37</sup> Cl]                                  |
| 59.96576798         | [ 59.960220186945, 59.971315773055004]   | 120.657    | COS                                                                                          | –                                                     |
| 81.93630978         | [ 81.9330864132061, 81.9395331467939]    | 6160.9695  | CCl <sub>2</sub>                                                                             | CCl <sub>2</sub>                                      |
| 82.94471578         | [ 82.93831758560036, 82.95111397439963]  | 319.247    | S <sub>2</sub> F, HCCl <sub>2</sub>                                                          | HCCl <sub>2</sub>                                     |
| 83.93374598         | [ 83.93024931474109, 83.9372426452589]   | 3956.1947  | –                                                                                            | CCl[ <sup>37</sup> Cl]                                |
| 84.94873618         | [ 84.92634272134954, 84.97112963865045]  | 140.2337   | H <sub>2</sub> S <sub>2</sub> F, H <sub>2</sub> OSeI, HNCI <sub>2</sub> , CF <sub>2</sub> Cl | HCCl[ <sup>37</sup> Cl]                               |
| 85.93171818         | [ 85.92419323227152, 85.93924312772849]  | 564.31     | OCl <sub>2</sub>                                                                             | C[ <sup>37</sup> Cl] <sub>2</sub>                     |
| 97.93130708         | [ 97.9236485334006, 97.9389656265994]    | 134.1543   | H <sub>2</sub> S <sub>3</sub> , COCl <sub>2</sub>                                            | COCl <sub>2</sub>                                     |
| 99.92428538         | [ 99.90729357057015, 99.94127718942985]  | 106.7792   | HS <sub>2</sub> Cl, HO <sub>2</sub> SeI, NOCl <sub>2</sub>                                   | COCl[ <sup>37</sup> Cl]                               |
| 116.90524258        | [116.90200574284233, 116.90847941715768] | 28974.7117 | CCl <sub>3</sub>                                                                             | CCl <sub>3</sub>                                      |
| 117.90830698        | [117.89455759263474, 117.92205636736527] | 189.527    | S <sub>2</sub> FCl, OSCl <sub>2</sub> , HCCl <sub>3</sub>                                    | [ <sup>13</sup> C]Cl <sub>3</sub>                     |
| 118.90232848        | [118.89897942315969, 118.9056775368403]  | 29078.7276 | –                                                                                            | CCl <sub>2</sub> [ <sup>37</sup> Cl]                  |
| 119.90716988        | [119.89648859190275, 119.91785116809724] | 182.0316   | C <sub>2</sub> S <sub>3</sub>                                                                | [ <sup>13</sup> C]Cl <sub>2</sub> [ <sup>37</sup> Cl] |
| 120.89913018        | [120.89523104367791, 120.90302931632209] | 9220.1959  | –                                                                                            | CCl[ <sup>37</sup> Cl] <sub>2</sub>                   |
| 122.89646308        | [122.8875535007597, 122.90537265924031]  | 886.6747   | CSBr                                                                                         | C[ <sup>37</sup> Cl] <sub>3</sub>                     |

The chosen possible atoms are H, C, N, O, F, S, Cl, Br, I. At start, only the abundant atoms are considered. The multi-valent atoms are C, N, O, S, the mono-valent are H, F, Cl, Br, I.

195 Consider now the target mass  $m = 116.90524258$  m/z, with uncertainty range  $m_{\min} = 116.90200574284233$ ,  $m_{\max} = 116.90847941715768$ . Our knapsack algorithm first lists all possible chemical formulae made of any number of the multi-valent atoms and so that the mass of the fragment is at most  $m_{\max}$ . There are 263 combinations whose DBE ranges from 2 to 20. For each fragment, its DBE value  $n$  is  
200 computed and a second knapsack algorithm is run to find a complement fragment made of at most  $n$  mono-valent atoms so that the total mass fits within the bounds  $m_{\min}, m_{\max}$  and the total DBE is positive or zero. For the mass  $m = 116.90524258$  m/z, there is one solution: CCl<sub>3</sub>.

To account for chemical formulae made of mono-valent atoms only, a final knap-  
205 sack algorithm is run to find the chemical formulae with only one or two mono-valent atoms whose mass fits in the uncertainty range (this gives the solution Cl for the mass 34.96878848).

**Table 8** isotopocules of CCl<sub>4</sub> and relative intensity. See also Fig. 3n in the main article.

| isotopocule                                                        | mass (m/z)   | proportion | relative intensity |
|--------------------------------------------------------------------|--------------|------------|--------------------|
| C                                                                  | 12.00000000  | 0.988922   | 1.000000           |
| [ <sup>13</sup> C]                                                 | 13.00335484  | 0.011078   | 0.011202           |
| Cl                                                                 | 34.96885271  | 0.757647   | 1.000000           |
| [ <sup>37</sup> Cl]                                                | 36.96590260  | 0.242353   | 0.319876           |
| CCl <sub>4</sub>                                                   | 151.87541084 | 0.325859   | 1.000000           |
| CCl <sub>3</sub> [ <sup>37</sup> Cl]                               | 153.87246073 | 0.416938   | 1.279504           |
| CCl <sub>2</sub> [ <sup>37</sup> Cl] <sub>2</sub>                  | 155.86951062 | 0.200052   | 0.613923           |
| CCl[ <sup>37</sup> Cl] <sub>3</sub>                                | 157.86656051 | 0.042661   | 0.130920           |
| C[ <sup>37</sup> Cl] <sub>4</sub>                                  | 159.86361040 | 0.003412   | 0.010470           |
| [ <sup>13</sup> C]Cl <sub>4</sub>                                  | 152.87876568 | 0.003650   | 0.011202           |
| [ <sup>13</sup> C]Cl <sub>3</sub> [ <sup>37</sup> Cl]              | 154.87581557 | 0.004671   | 0.014333           |
| [ <sup>13</sup> C]Cl <sub>2</sub> [ <sup>37</sup> Cl] <sub>2</sub> | 156.87286546 | 0.002241   | 0.006877           |
| [ <sup>13</sup> C]Cl[ <sup>37</sup> Cl] <sub>3</sub>               | 158.86991535 | 0.000478   | 0.001467           |
| [ <sup>13</sup> C][ <sup>37</sup> Cl] <sub>4</sub>                 | 160.86696524 | 0.000038   | 0.000117           |

## 7 Results for the validation set

Results for the validation set are given in Fig. 4 and Fig. 5.

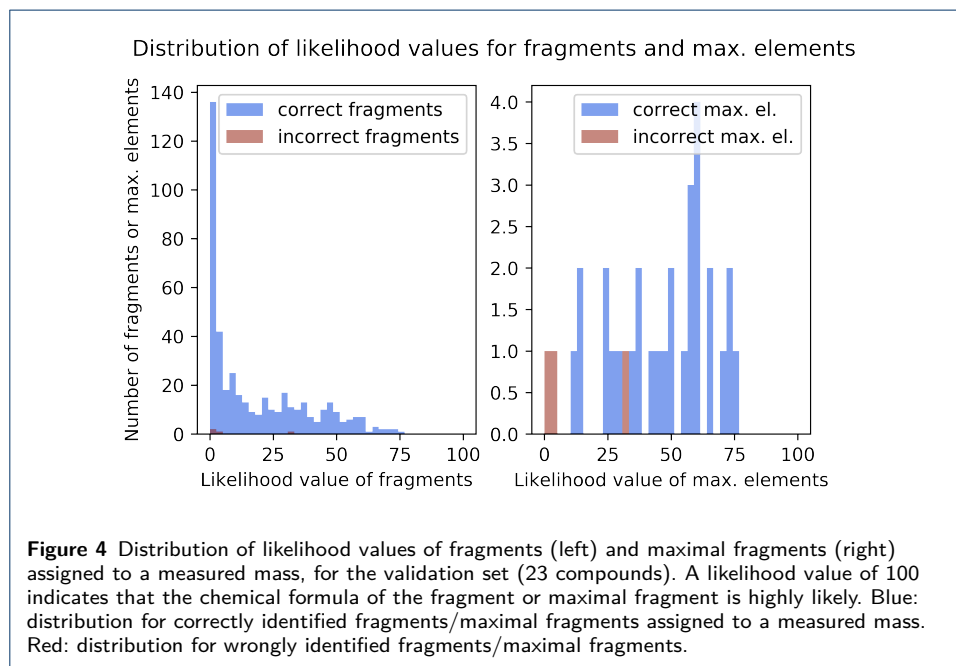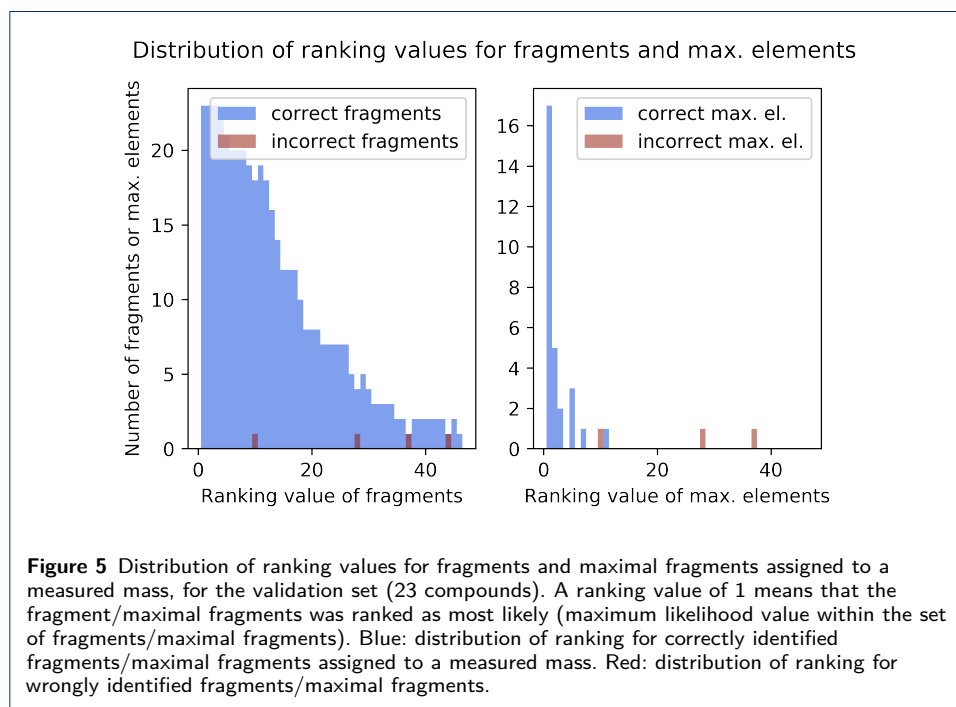

## 210 8 Testing the MOLGEN-MS commercial software

MOLGEN-MS is a commercial software aiming at reconstructing the correct chemical formula and structure of an unknown substance for which the EI spectrum is provided, with unit mass resolution. The MOLGEN-MS workflow is made of the following steps [5]:

- 215 • MSclass: module to identify which chemical classes are likely present or not in the EI mass spectrum. This module uses a pre-defined list;
- EICoCo: module to guess the most likely weight(s) of the molecular ion, with unit mass resolution. It can (or not) use inputs from MSclass. Using the guessed molecular weight(s), all matching chemical formulae are generated, 220 using a list of chemical elements that can be user-defined.
- MOLGEN: using all generated chemical formulae, generates all possible chemical structures. These structures are then fragmented and the obtained fragments are compared to the measured ones. All candidate structures are ranked, the most likely first.

225 We used a 90-days free version kindly provided by Markus Meringer, version 1.0.1.5. We first converted all our data into a compatible format (.TRA). All masses were converted to unit mass resolution. We used the default settings in MOLGEN-MS and keeping user intervention at the minimum. We used the same chemical elements as in our software: H, C, N, O, F, S, Cl, Br, I. We do not use Si and P 230 that occur very seldom in our type of samples. We tested MOLGEN-MS using two different settings: with and without the MSclass module. When using the MSclass module, the output was then directly used in the EICoCo module, without any user manipulation of the results. For the EICoCo module, we used the default parameter for the confidence interval for guessing the molecular weight (98). We did not use 235 a minimum match value to eliminate candidate formula with a match value lower than a threshold. We then checked if the correct molecular weight was listed within the solutions.

We do not include the following substances in the discussion below because their true molecular weight is outside our detection mass range: C<sub>6</sub>F<sub>14</sub> in the training 240 set and TCHFB in the validation set.

In MOLGEN-MS, when using MSclass followed by EICoCo, on the training set, only three substances have the correct molecular formula listed (COS, benzene and dichlorodifluoromethane). We actually obtain better results when not using the submodule MS-class. When using EICoCo alone, with the default precision value 245 for the molecular weight (98), and no minimum precision for the molecular formula, the correct molecular formula is listed in 15 cases of the training set (out of 35, this is 43%), with rankings from 1 to 45. If a user manually puts in the correct molecular weight, then the correct molecular formula is listed in 28 cases (out of 35, this is 80%). Two cases with no correct solution require the Sulphur atom to have a set 250 valence of 6, which may not be the default setting in MOLGEN-MS. In 6 cases, the correct molecular formula was listed only if the correct number of each atom was given as input. We do not have an explanation for this.

MOLGEN-MS provides better results on the validation set: for 17 compounds out of 22 (77%), the correct molecular formula is listed (without using MSclass), 255 with ranking from 1 to 46. On average, the correct molecular formula is listed using

MOLGEN-MS-ElCoCo in 56% of the cases, in the worse conditions where no user intervention is provided at all.

We provide all input data file in a MOLGEN-MS compatible format as zip file.

We believe that to identify the structure of an unknown compound, a promising  
260 setup may be to first run our ALPINAC software on the high resolution mass spec-  
trum, and use the suggested molecular ion(s) together with the unit mass resolution  
spectrum as input to MOLGEN-MS, where the MOLGEN module would be used.

#### Author details

<sup>1</sup>Laboratory for Air Pollution /Environmental Technology, Empa, Swiss Federal Laboratories for Materials Science  
265 and Technology, Ueberlandstrasse 129, 8600 Dübendorf, Switzerland. <sup>2</sup>Université de Lorraine, CNRS, Inria, LORIA,  
54000 Nancy, France.

#### References

1. NIST: NIST EPA NIH Mass Spectral Library. Online database (2020).  
<https://www.nist.gov/srd/nist-standard-reference-database-1a-v17> Accessed 11.03.2020
- 270 2. ChemSpider: ChemSpider: Search and share chemistry. Online database (2020). <https://www.chemspider.com>  
Accessed 11.03.2020
3. National Center for Biotechnology Information: Online database of the National Library of Medicine. Online  
(2020). <https://pubchem.ncbi.nlm.nih.gov/> Accessed 08.08.2020
4. Yergey, J.A.: A general approach to calculating isotopic distributions for mass spectrometry. *International*  
275 *Journal of Mass Spectrometry and Ion Physics* **52**, 337–349 (1983). doi:10.1002/jms.4498. e4498 JMS-20-0003
5. Meringer, M.: MOLGEN-MS: Evaluation of low resolution electron impact mass spectra without database search.  
Technical report (2000). [https://molgen.de/documents/MolgenMS\\_manual/index.html](https://molgen.de/documents/MolgenMS_manual/index.html)
